# Supplementary material for: Identification of core genes in ovarian cancer by an integrative meta-analysis
Source: Springer Nature journal article supplement (doi:10.1186/s13048-018-0467-z), 2018-11-19

# UBE2C

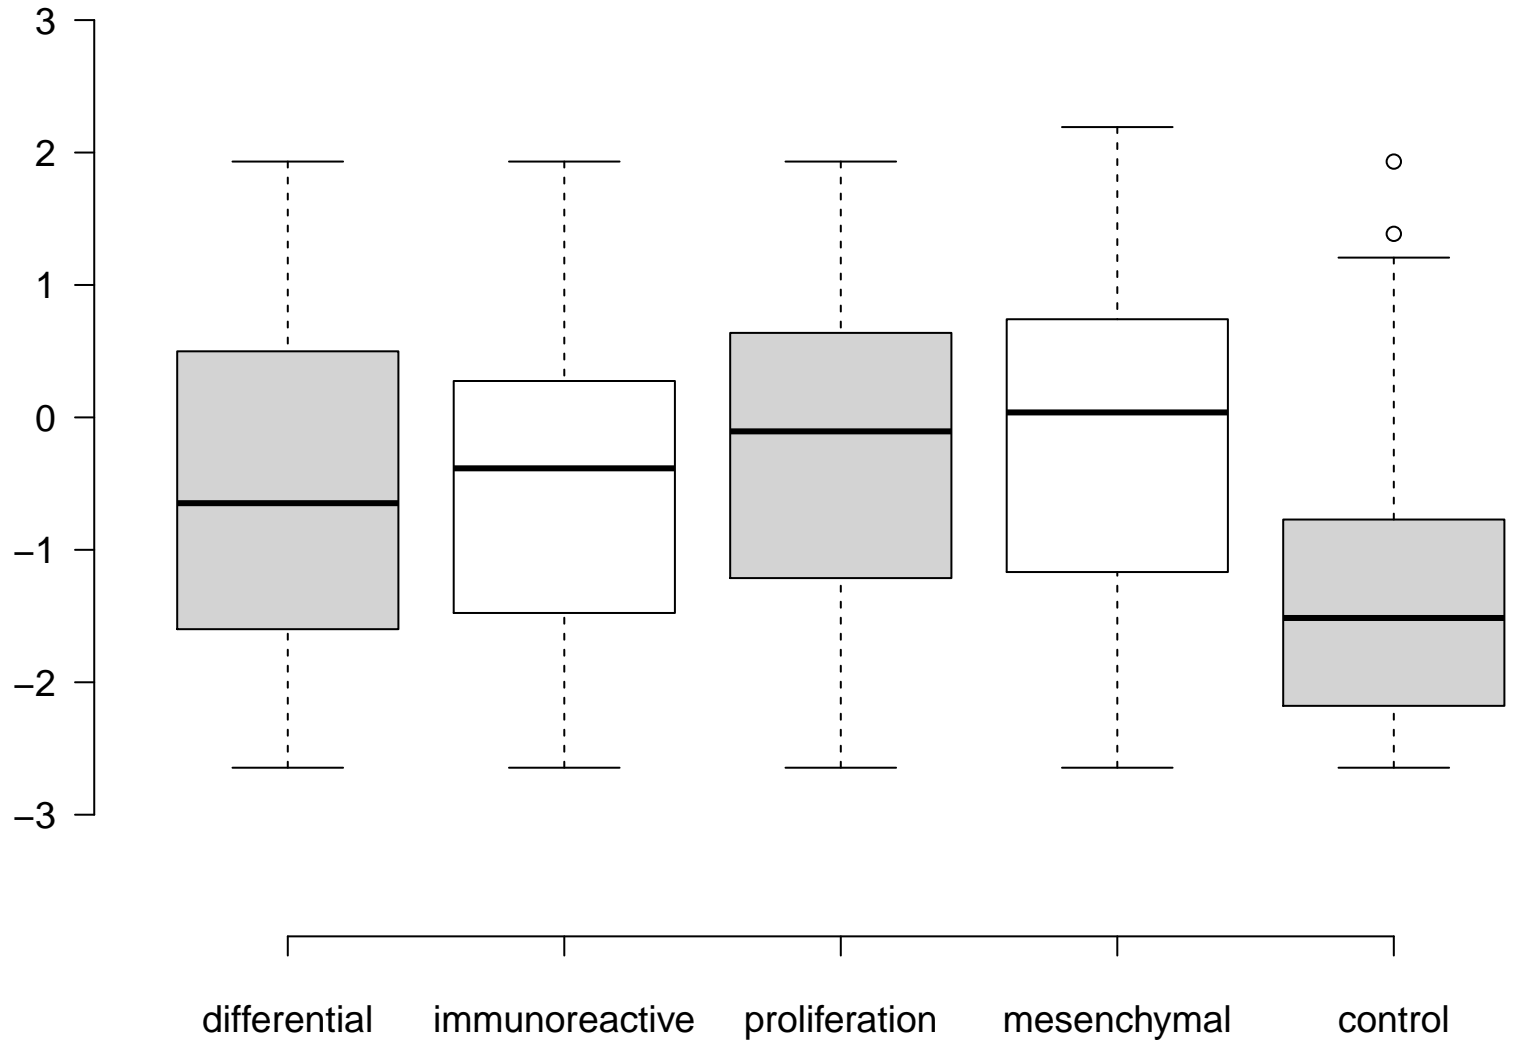

Supplement: MOESM15 [file 16279902]
